# Supplementary material
Source: publisher site journal article supplement (https://www.dovepress.com/article/271623)
Supplement: Supplementary file 1 [file get_supplementary_file.php]

# RECEIVING FEEDBACK OSTE SCALE

Observer: \_\_\_\_\_

Observee: \_\_\_\_\_

Date: \_\_\_\_\_

**INSTRUCTIONS:** Please rate the quality of the following feedback domains (if not observed, please select N/A):

| DOMAIN                                                                                   | 1-NEEDS WORK                                                                                                                                   | 2-SKILLS IN DEVELOPMENT  | 3-MEETS ACCEPTABLE STANDARD                                                                                                               | 4-APPROACHING EXCELLENCE | 5-EXCELLENT                                                                                                                                          | N/A                      | NOTES |
|------------------------------------------------------------------------------------------|------------------------------------------------------------------------------------------------------------------------------------------------|--------------------------|-------------------------------------------------------------------------------------------------------------------------------------------|--------------------------|------------------------------------------------------------------------------------------------------------------------------------------------------|--------------------------|-------|
| 1.<br>The learner <b>demonstrated curiosity</b> about feedback.                          | <input type="checkbox"/><br><ul style="list-style-type: none"> <li>Reacted defensively</li> <li>Refused to accept feedback</li> </ul>          | <input type="checkbox"/> | <input type="checkbox"/><br><ul style="list-style-type: none"> <li>Accepted information</li> <li>Lacked interest</li> </ul>               | <input type="checkbox"/> | <input type="checkbox"/><br><ul style="list-style-type: none"> <li>Showed interest</li> <li>Welcomed more information</li> </ul>                     | <input type="checkbox"/> |       |
| 2.<br>The learner <b>asked for clarification</b> .                                       | <input type="checkbox"/><br><ul style="list-style-type: none"> <li>Stated "didn't understand feedback"</li> </ul>                              | <input type="checkbox"/> | <input type="checkbox"/><br><ul style="list-style-type: none"> <li>Asked follow-up question</li> </ul>                                    | <input type="checkbox"/> | <input type="checkbox"/><br><ul style="list-style-type: none"> <li>Asked follow-up questions</li> <li>Taught back</li> </ul>                         | <input type="checkbox"/> |       |
| 3.<br>The learner <b>demonstrated insights</b> into strengths and areas for improvement. | <input type="checkbox"/><br><ul style="list-style-type: none"> <li>No specifics (i.e. "It went fine")</li> </ul>                               | <input type="checkbox"/> | <input type="checkbox"/><br><ul style="list-style-type: none"> <li>Stated general strengths</li> <li>Stated general deficits</li> </ul>   | <input type="checkbox"/> | <input type="checkbox"/><br><ul style="list-style-type: none"> <li>Stated specific strengths</li> <li>Stated deficits and ways to address</li> </ul> | <input type="checkbox"/> |       |
| 4.<br>The learner <b>accepted the feedback</b> .                                         | <input type="checkbox"/><br><ul style="list-style-type: none"> <li>Stated outside factors</li> <li>Did not accept own role</li> </ul>          | <input type="checkbox"/> | <input type="checkbox"/><br><ul style="list-style-type: none"> <li>Stated factors</li> <li>Made excuses, but accepted own role</li> </ul> | <input type="checkbox"/> | <input type="checkbox"/><br><ul style="list-style-type: none"> <li>Explained factors, but did not excuse</li> </ul>                                  | <input type="checkbox"/> |       |
| 5.<br>The learner created a <b>follow-up</b> plan.                                       | <input type="checkbox"/><br><ul style="list-style-type: none"> <li>General "let's follow-up"</li> <li>No times or goals established</li> </ul> | <input type="checkbox"/> | <input type="checkbox"/><br><ul style="list-style-type: none"> <li>Said future goals</li> <li>No specific time determined</li> </ul>      | <input type="checkbox"/> | <input type="checkbox"/><br><ul style="list-style-type: none"> <li>Said future goals</li> <li>Determined specific time</li> </ul>                    | <input type="checkbox"/> |       |
| 6.<br>The learner <b>demonstrated appreciation</b> for feedback.                         | <input type="checkbox"/><br><ul style="list-style-type: none"> <li>Insincere, sarcastic</li> </ul>                                             | <input type="checkbox"/> | <input type="checkbox"/><br><ul style="list-style-type: none"> <li>Unenthusiastic "thank you"</li> </ul>                                  | <input type="checkbox"/> | <input type="checkbox"/><br><ul style="list-style-type: none"> <li>Enthusiastic</li> <li>Expresses gratitude</li> </ul>                              | <input type="checkbox"/> |       |
| 7.<br>The learner <b>listened without interrupting or dominating</b> the discussion.     | <input type="checkbox"/><br><ul style="list-style-type: none"> <li>Interrupted often</li> <li>Talked much more</li> </ul>                      | <input type="checkbox"/> | <input type="checkbox"/><br><ul style="list-style-type: none"> <li>Interrupted 1-2 times</li> <li>Talked &gt;50%</li> </ul>               | <input type="checkbox"/> | <input type="checkbox"/><br><ul style="list-style-type: none"> <li>Did not interrupt</li> <li>Shared time equally</li> </ul>                         | <input type="checkbox"/> |       |

8.

The learner treated teacher **with respect**:

Check all  
that  
apply:

- ☐ Spoke or stood at eye level
- ☐ Used name
- ☐ Maintained good eye contact
- ☐ Appropriate tone
- ☐ Appropriate body posture
- ☐ Other (specify): \_\_\_\_\_

- |                          |                          |                          |                          |                                |                          |
|--------------------------|--------------------------|--------------------------|--------------------------|--------------------------------|--------------------------|
| <input type="checkbox"/>       | <input type="checkbox"/> |
| ▪ 1 item on checklist    |                          | ▪ 3 items on checklist   |                          | ▪ 5 or more items on checklist |                          |

## Supplementary Material - Presentation

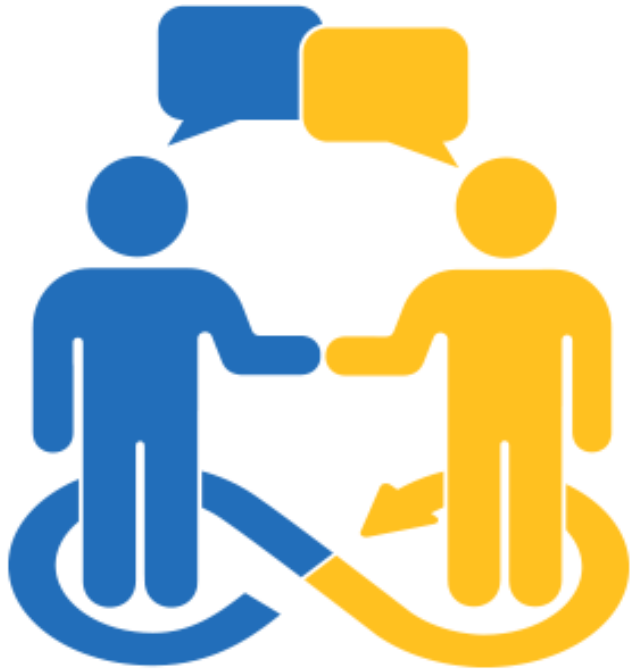

# Receiving feedback in the clinical setting

Jeffrey H. William, MD

Assistant Professor of Medicine, HMS

Co-Firm Chief (Tullis Firm), BIDMC IM Residency

Associate Program Director, Nephrology Fellowship

Attending Physician, Division of Nephrology

# Outline

- The neuroscience behind feedback
- Brief literature review
- How we deflect constructive feedback
- Skills and strategies for receiving feedback

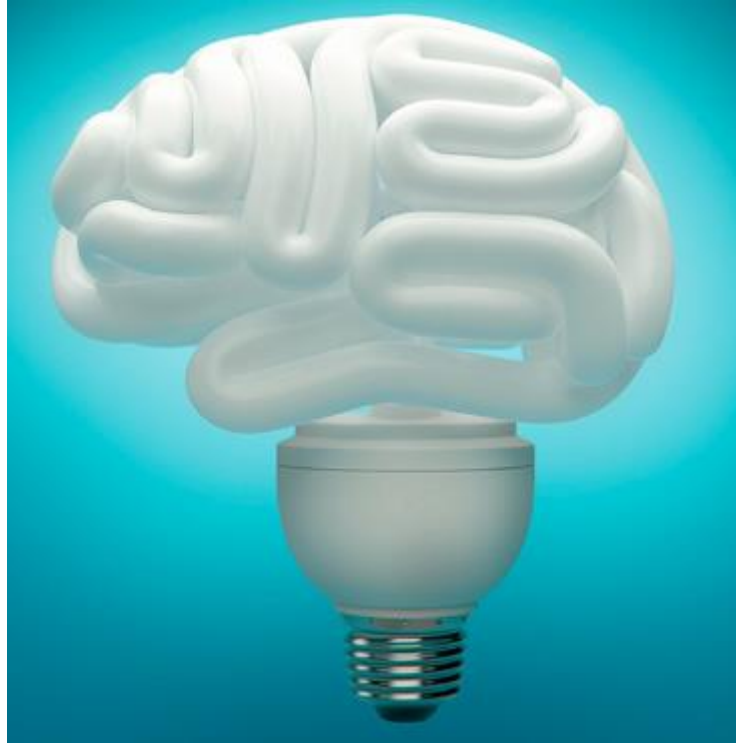

# **THE NEUROSCIENCE BEHIND FEEDBACK**

# How our brains work

**Motivated reasoning** (*aka motivated cognition*) occurs when...

“...the goals and needs of individuals steer their thinking towards desired conclusions.”

# Prerequisites for motivated reasoning

1. There must be some ‘meaning’ or value in the interpretation (valence)
2. There must be a preferred interpretation which meets the goal of the person (a preferred interpretation)
3. There must be enough **uncertainty** surrounding the issue that the preferred interpretation is at least somewhat plausible

## Examples:

- **2 + 2 = 4** is not open to motivated cognition (no to 1., 2. or 3.)
- **“I am a good teacher”** is open to motivated reasoning (yes to 1., 2. and 3.)
- **“In my experience, that lab test is not needed”** is open to motivated reasoning

## System 1

Heuristic  
Fast  
Automatic  
Effortless

# How we process feedback

## System 2

Analytic  
Slow  
Effortful  
Cognitive

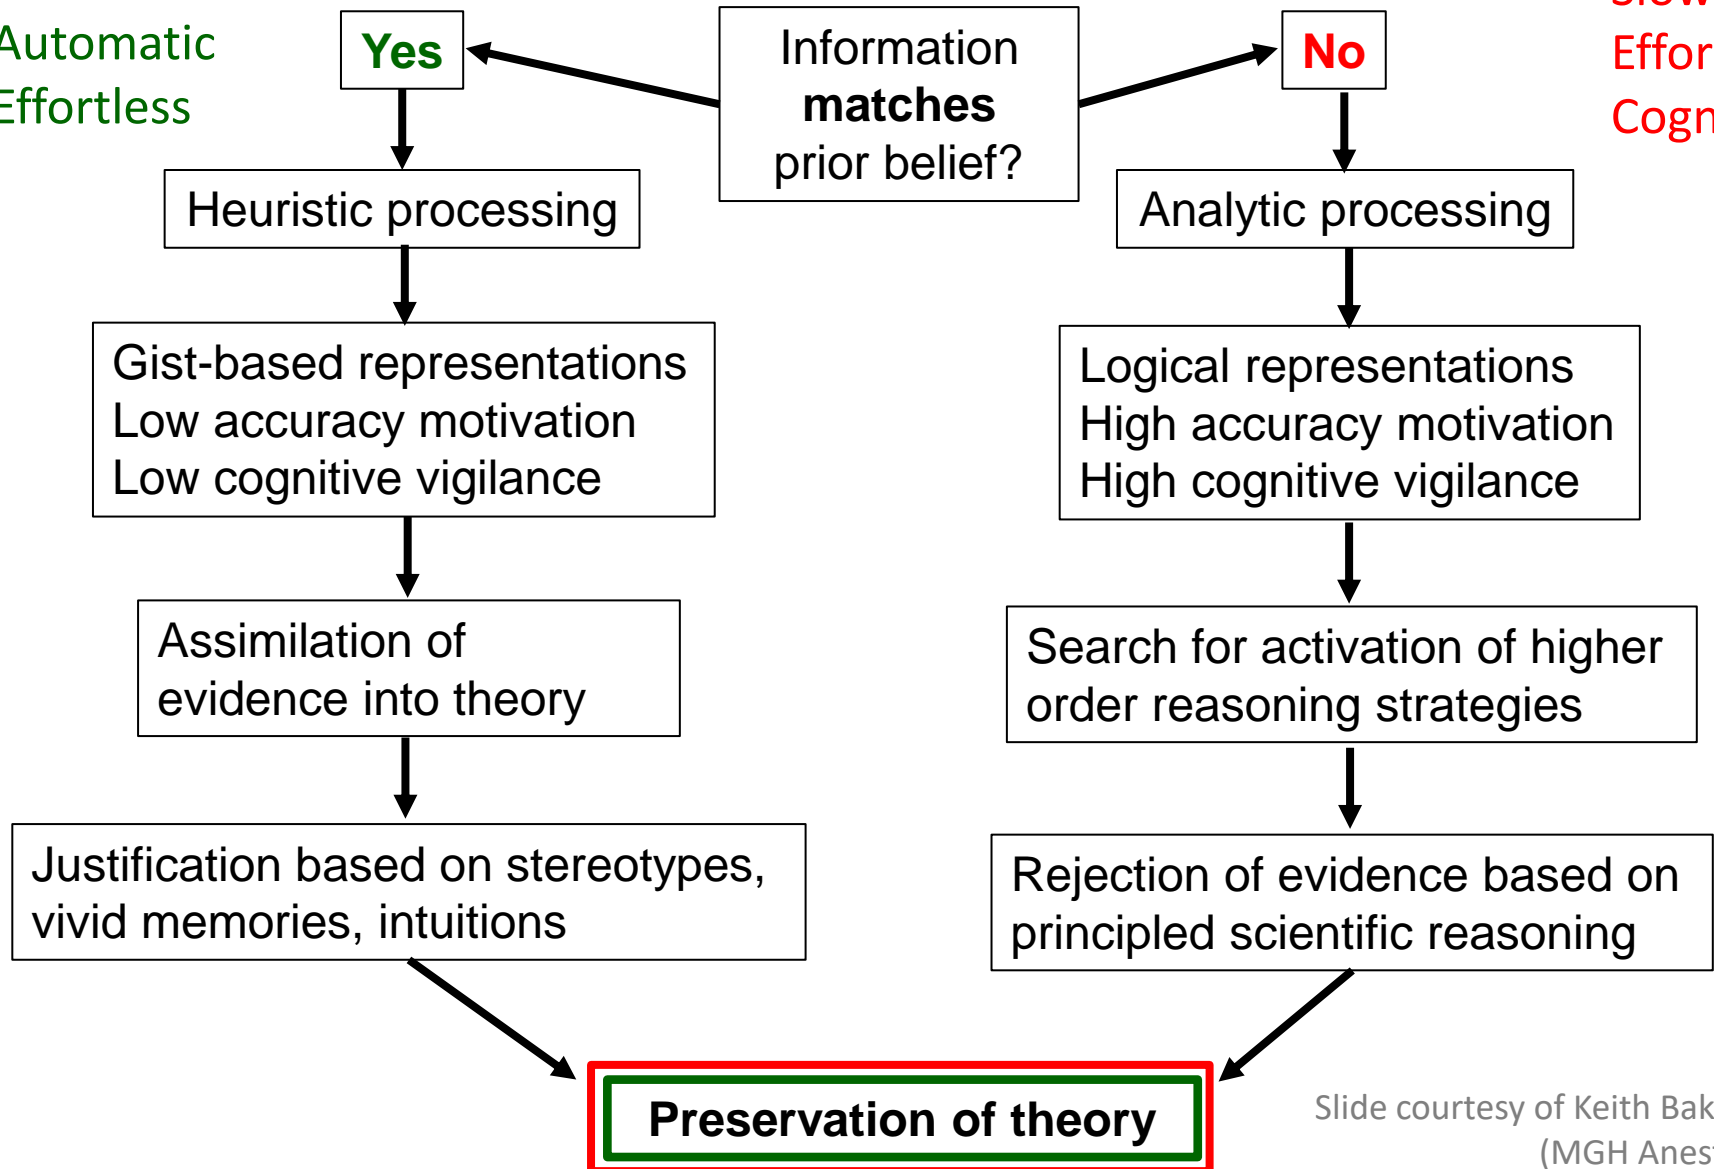

# “Digging for Ponies”

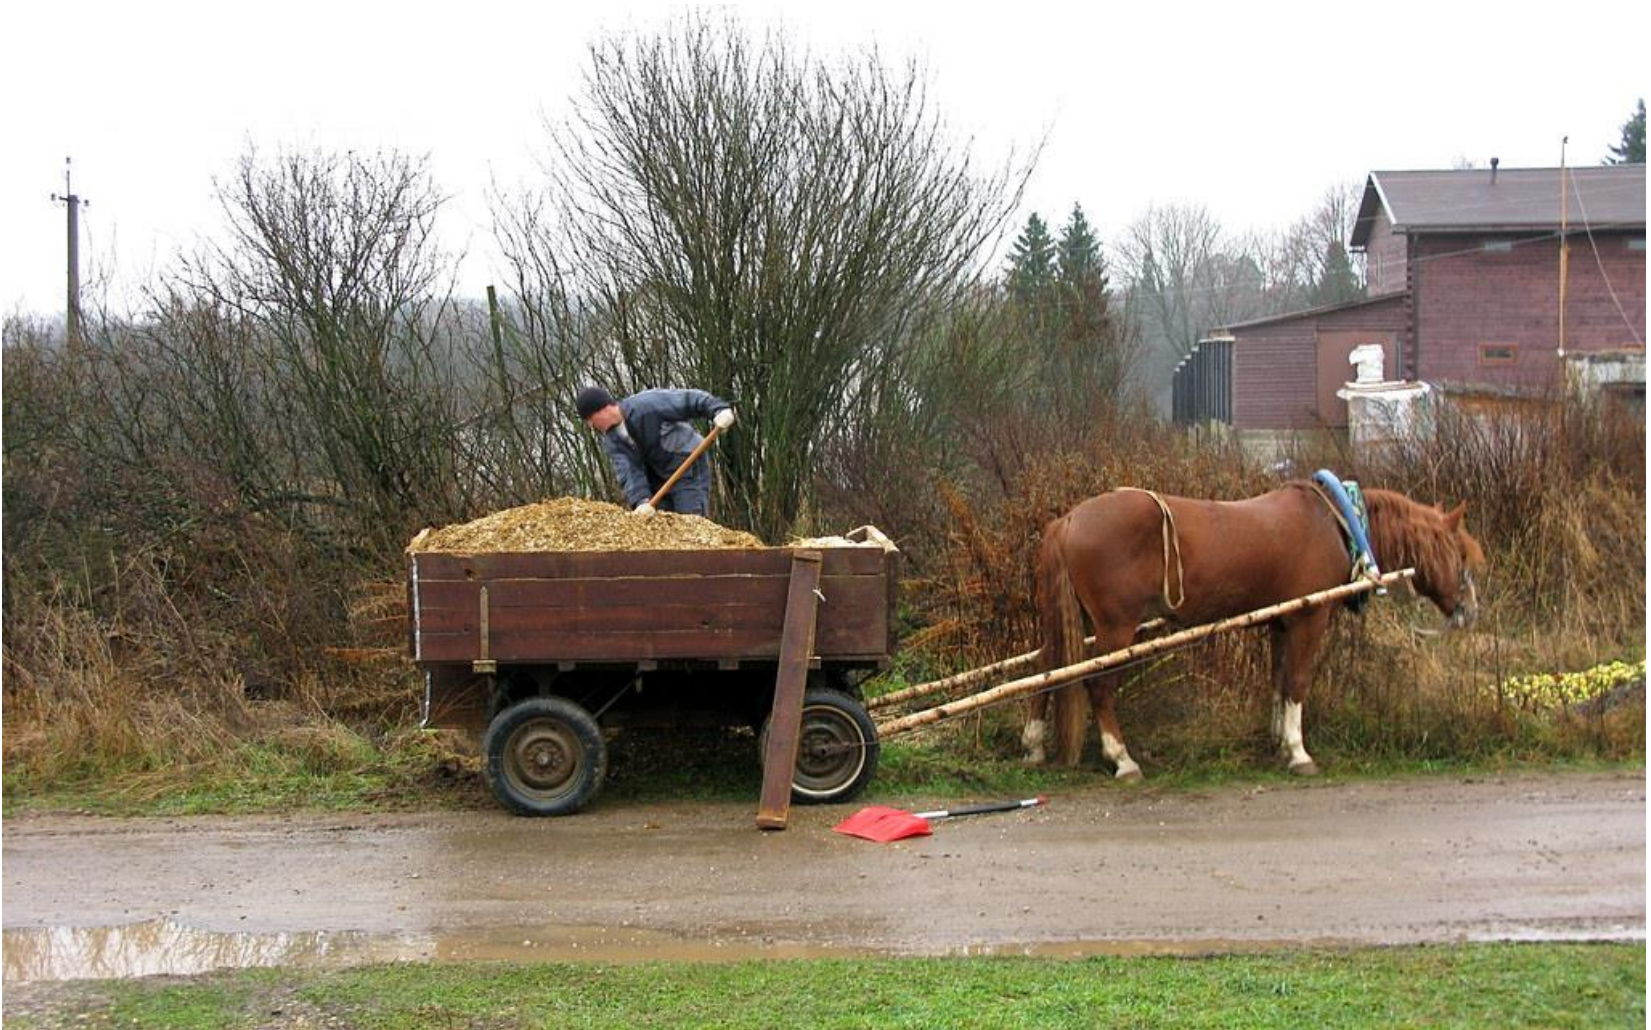

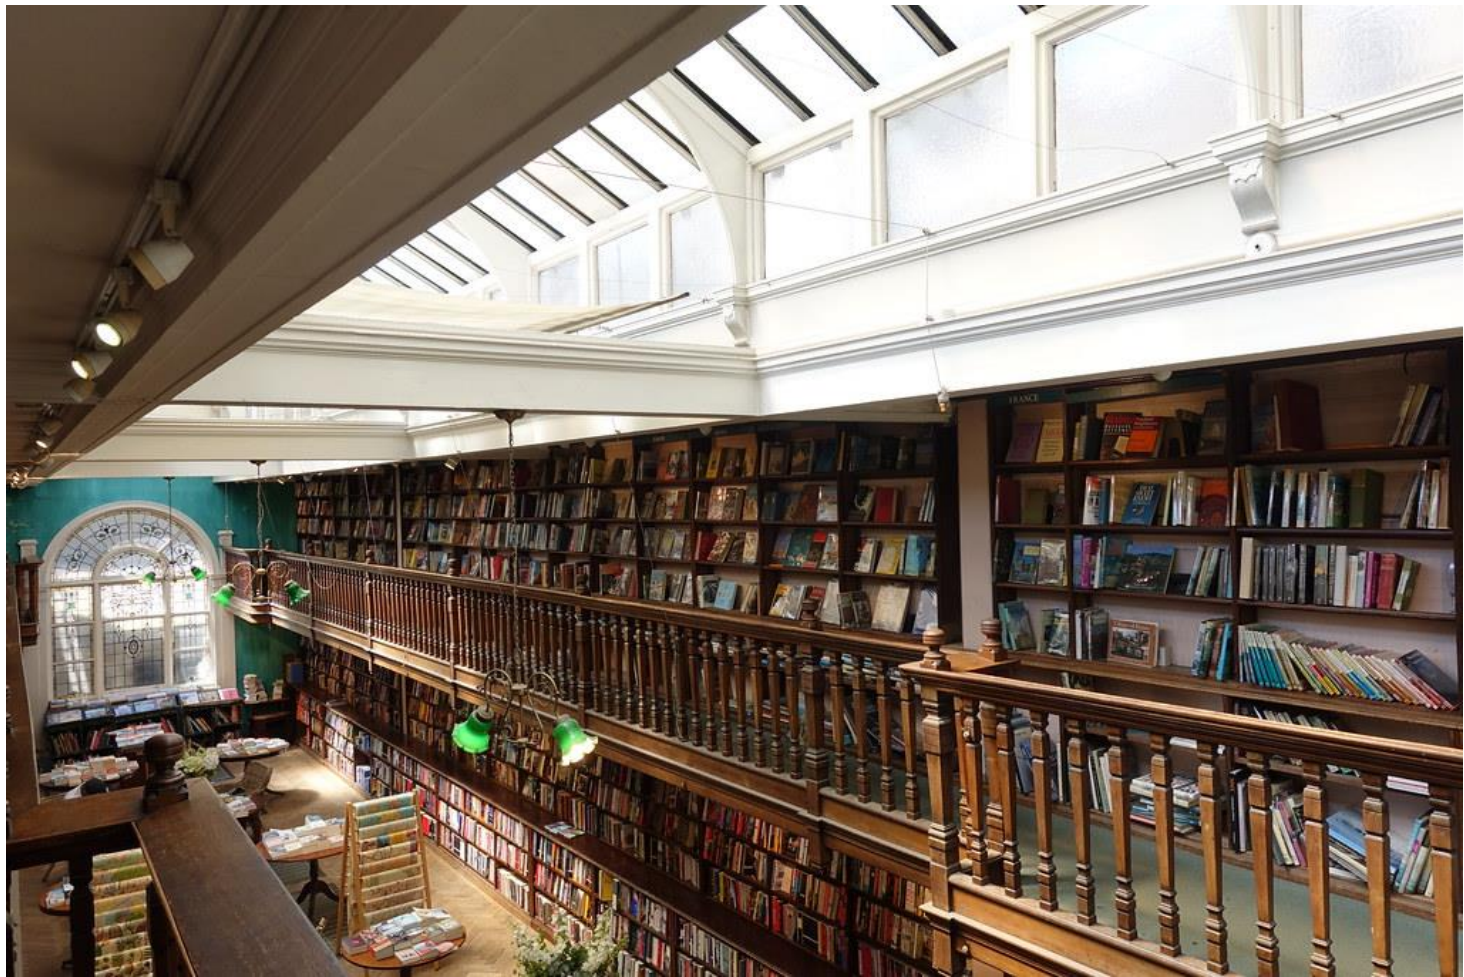

# **BRIEF LITERATURE REVIEW**

# Barriers to receiving feedback

- Learner ownership and self-awareness are key to the behavior changes that valuable feedback can affect.
- Why do learners feel like they are not receiving valuable feedback?
  - Inability to self-assess
  - Lack of metacognitive abilities
  - Defensiveness to corrective feedback

# *An investigation of medical student reactions to feedback: a randomised trial*

Boehler et al. Med Educ 2006

## **Design**

- Group 1 received specific, constructive feedback on how to improve their knot-tying skills.
- Group 2 received only general compliments.

## **Results**

- Group 1 → showed greater improvement in clinical performance
- Group 2 → higher satisfaction scores

“No one likes to give negative feedback,  
but everyone wants to hear it.”

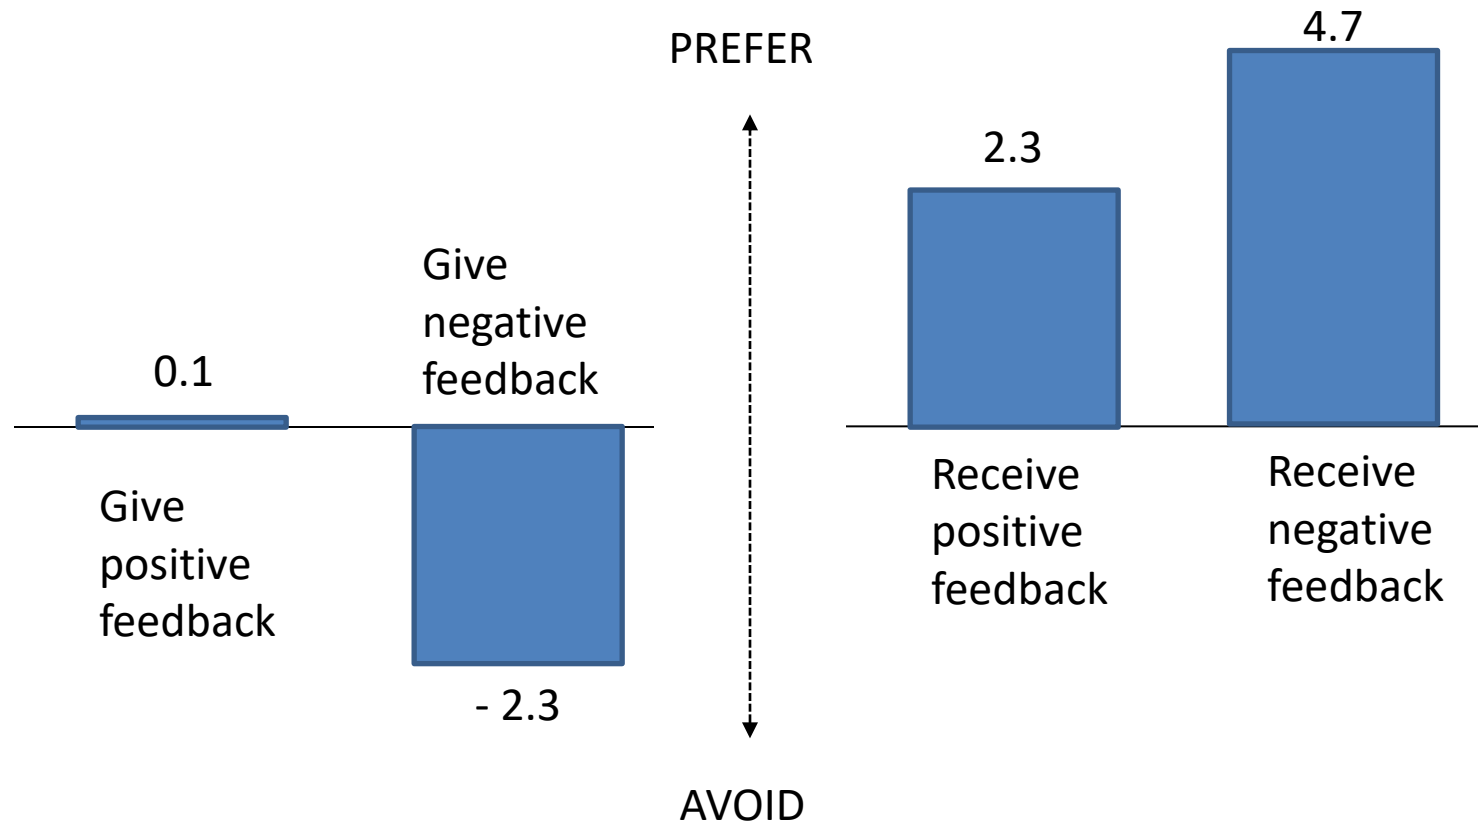

Adapted from Zenger and Folkman,  
Harvard Business Review, Jan 15<sup>th</sup> 2014

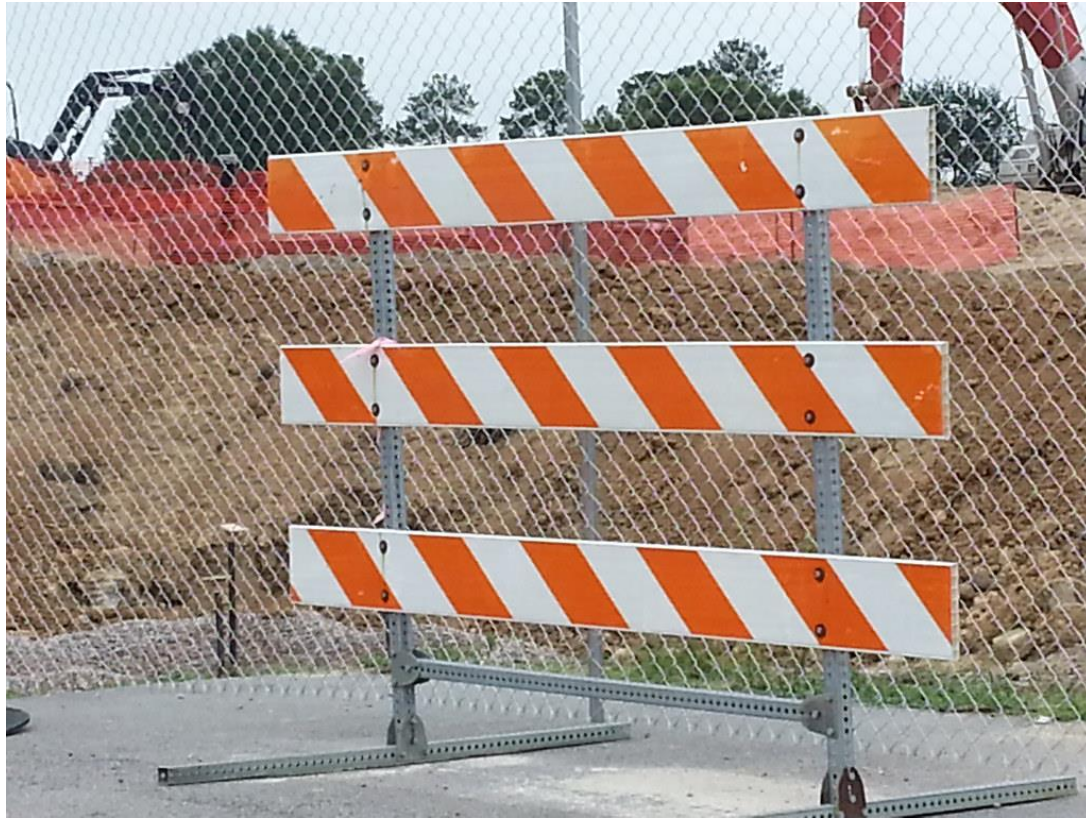

# **HOW WE DEFLECT CONSTRUCTIVE FEEDBACK**

# “Wrong-spotting”

- The process by which we figure out how the constructive feedback provided to us must be incorrect or inaccurate

# Some examples

- **Literally wrong** - “I actually did mention that in my note...you must not have seen it.”
- **Misinterpretation** – “My e-mail wasn’t unprofessional. That’s my style of communication.”
- **Maybe that works for you** – “...but I can’t tie a knot like that and this way works better for me.”
- **Do as I say, not as I do** – “But *you* don’t always do your heart exam under the patient’s clothing...”

# View from the other side

- Why am I getting this feedback?
- Why are we seeing things differently?
  - Interpretation
  - Previous experiences
  - Personal bias

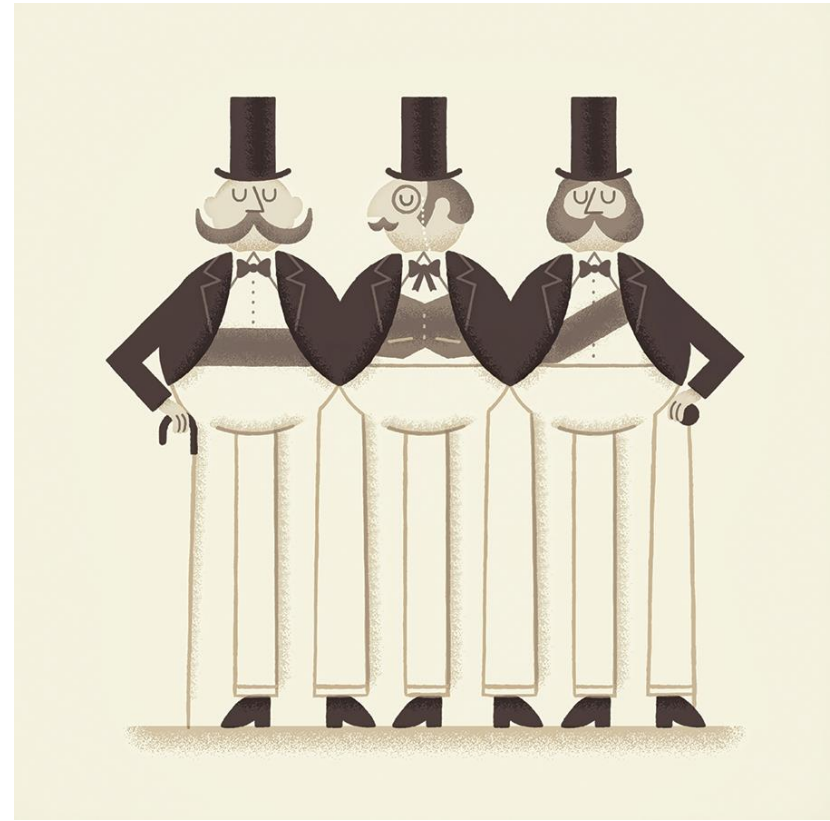

# Be prepared!

- Feedback may come at any time, even in an informal setting (possibly in front of others)
- Constructive feedback is rare and should be coveted, not dismissed
- Feedback may not always happen in the “right place, right time”
- At the time, the critical comments may not always *feel* right, but perhaps they are?

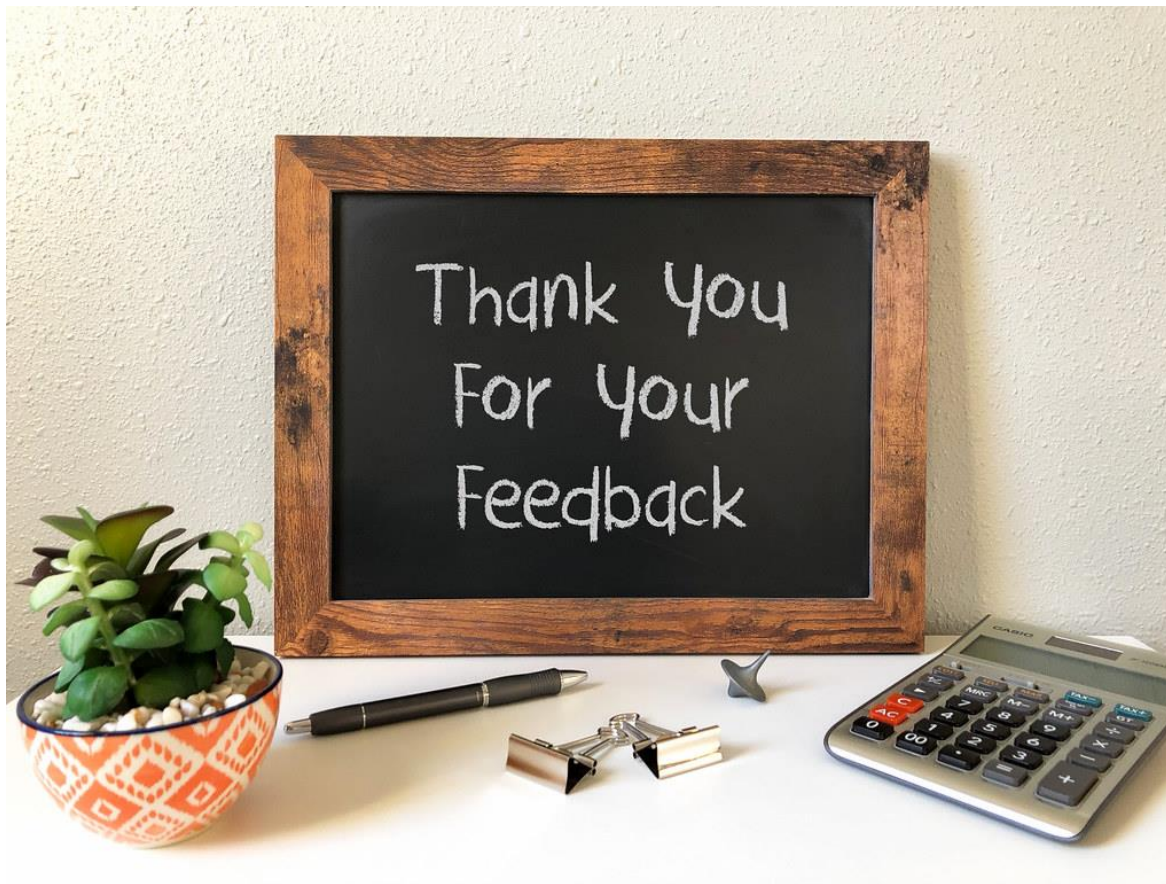

# **SKILLS AND STRATEGIES FOR RECEIVING FEEDBACK**

# Strategies for receiving feedback

- **Listen**
- **Clarify**
- **Accept**
- **Be proactive**
- **Express gratitude (say “thank you”)**

# Strategies for receiving feedback

- Listen

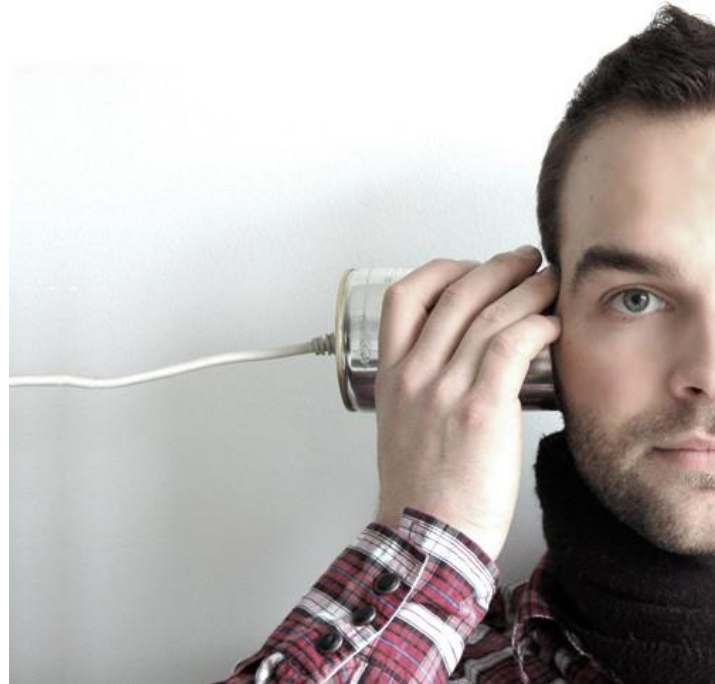

# Strategies for receiving feedback

- Listen
- Clarify

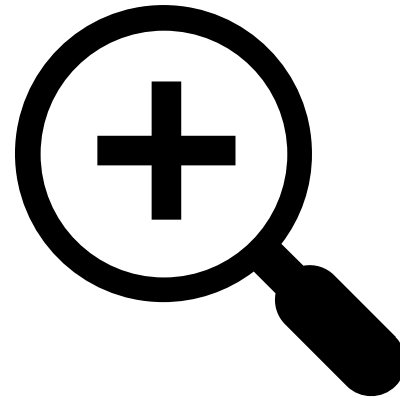

# Strategies for receiving feedback

- Listen
- Clarify
- **Accept**

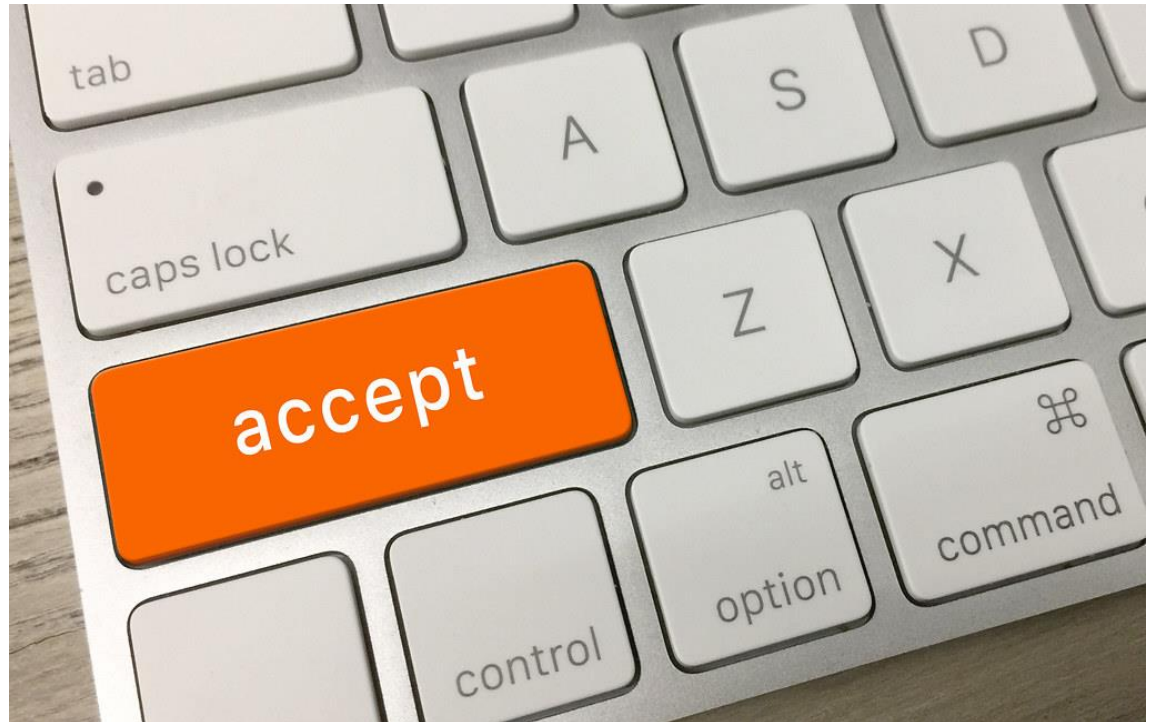

# Strategies for receiving feedback

- Listen
- Clarify
- Accept
- Be proactive

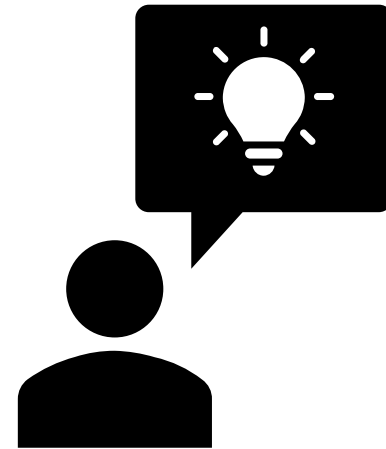

# Strategies for receiving feedback

- Listen
- Clarify
- Accept
- Be proactive
- Express gratitude

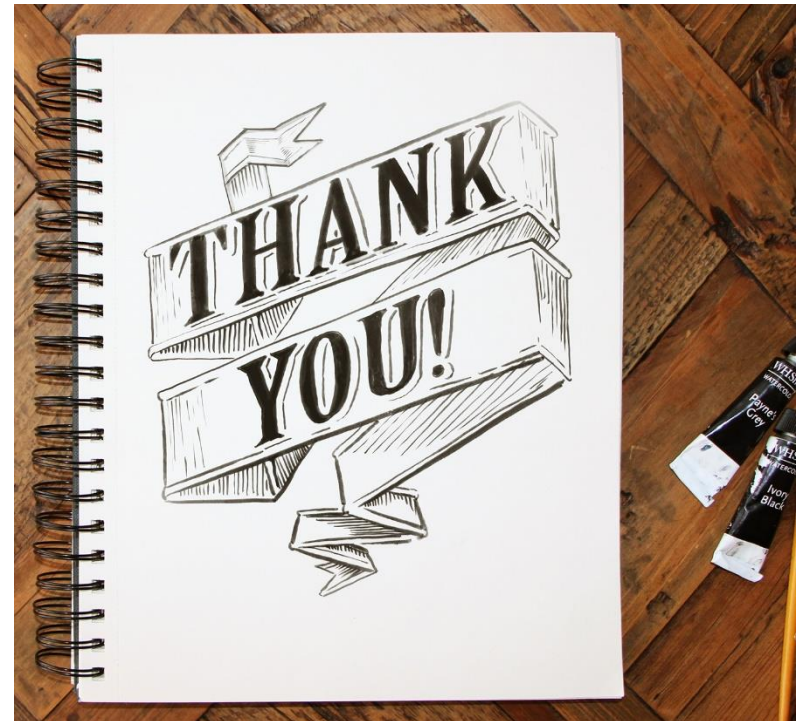

# Practice in pairs!

## Case Scenario

You have just finished giving an oral patient presentation. You are particularly proud because you feel that you not only did a really good job, but you also limited yourself to 30 minutes in the patient's room for the full history and physical exam.

Your preceptor has chosen to give you feedback that is focused on your time management, explaining the 30 minutes is still too long. He/She says very little about the quality of your presentation. You are frustrated because you don't feel like you can do a good job in less than 30 minutes and the quality of your presentation (and eventual patient care when you start on the wards) will suffer.

# Your experiences

- What was easy for you?
  - What was challenging for you?
  - What were your barriers to receiving this feedback effectively?
- 
- What did you or your partner do especially well?
  - How can you improve your own response to constructive feedback in the future?

# Session summary

Our brains are hard-wired to rationalize and downplay constructive feedback.

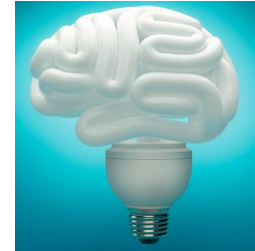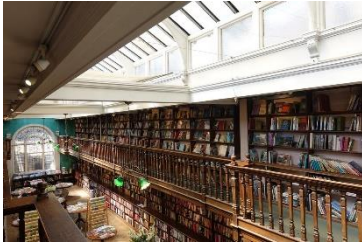

The literature shows that medical students can improve in their receipt of feedback (as much as the faculty can improve their delivery!)

There are numerous ways in which we deflect constructive feedback, providing excuses and not seeing the feedback from the other person's perspective.

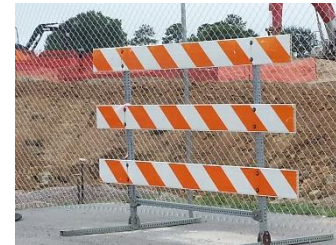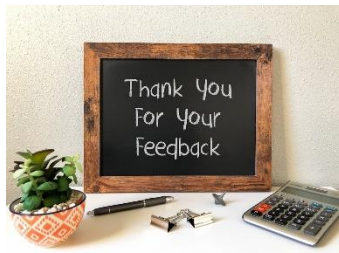

Skills and strategies for receiving feedback can serve you well in slowing you down when the feedback comes: listen, clarify, accept, be proactive, and express gratitude.
